# Supplementary material
Source: PubMed Central journal article supplement (PMC8525565)
Supplement: jcm.01357-21-s0001.pdf [file jcm.01357-21-s0001.pdf]

1 Supplemental Table 1. Static pre-incubation does not improve test sensitivity.

| Organism                  | Pre-Inc | Days to detection for each condition: |                        |                                    |                        |          |
|---------------------------|---------|---------------------------------------|------------------------|------------------------------------|------------------------|----------|
|                           |         | <i>i</i> FA <sup>+</sup><br>22.5°C    | <i>i</i> LYM<br>22.5°C | <i>i</i> FA <sup>+</sup><br>32.5°C | <i>i</i> LYM<br>32.5°C | MFL 35°C |
| <i>C. albicans</i>        | 0 h     | 1.1                                   | 0.9                    | 2.5                                | 2.1                    | 1.0      |
|                           | 2-8 h   | 2.4                                   | 2.1                    | 1.1                                | 1.0                    | 1.0      |
|                           | 16-24 h | 1.7                                   | 1.6                    | 1.2                                | 1.1                    | 1.1      |
|                           | 24-36 h | 2.3                                   | 1.6                    | 1.7                                | 1.6                    | 1.7      |
|                           | >48 h   | 2.6                                   | 2.6                    | 2.6                                | 2.6                    | 2.9      |
| <i>C. albicans</i> QC     | 0 h     | 2.8                                   | 2.2                    | 1.4                                | 1.1                    | 3.8      |
|                           | 2-8 h   | 2.6                                   | 1.5                    | 1.4                                | 1.1                    | 4.2      |
|                           | 16-24 h | 2.5                                   | 2.0                    | 1.6                                | 1.3                    | 3.2      |
|                           | 24-36 h | 2.3                                   | 1.9                    | 1.7                                | 1.5                    | 5.1      |
|                           | >48 h   | 2.3                                   | 2.1                    | 2.1                                | 2.0                    | 5.8      |
| <i>Cryptococcus</i> sp.   | 0 h     | 2.5                                   | 2.7                    | 1.8                                | 2.2                    | 8.2      |
|                           | 2-8 h   | 2.4                                   | 2.8                    | 1.9                                | 2.2                    | 5.4      |
|                           | 16-24 h | 2.1                                   | 2.9                    | 2.0                                | 2.2                    | 3.8      |
|                           | 24-36 h | 2.1                                   | 2.7                    | 1.9                                | 2.4                    | 4.1      |
|                           | >48 h   | 2.7                                   | 2.5                    | 2.5                                | 2.4                    | 2.1      |
| <i>Rhodotorula</i> sp.    | 0 h     | 3.2                                   | 2.4                    | 6.2                                | 4.0                    | 6.1      |
|                           | 2-8 h   | 5.2                                   | 4.1                    | 3.2                                | 2.5                    | 5.9      |
|                           | 16-24 h | 5.8                                   | 3.9                    | 3.5                                | 2.5                    | 5.1      |
|                           | 24-36 h | 4.0                                   | 3.2                    | 2.8                                | 2.5                    | 5.6      |
|                           | >48 h   | 3.0                                   | 3.2                    | 3.4                                | 3.7                    | 3.3      |
| <i>A. brasiliensis</i> QC | 0 h     | 14.0                                  | 5.2                    | 1.9                                | 5.0                    | 3.8      |
|                           | 2-8 h   | 11.4                                  | 4.8                    | 2.7                                | 2.1                    | 4.2      |
|                           | 16-24 h | N.D.                                  | 4.9                    | 3.4                                | 2.9                    | 3.2      |
|                           | 24-36 h | 7.5                                   | 5.7                    | 3.6                                | 3.0                    | 5.1      |
|                           | >48 h   | N.D.                                  | 4.7                    | 3.9                                | 3.7                    | 5.8      |
| <i>A. terreus</i>         | 0 h     | 3.2                                   | 2.5                    | 11.3                               | N.D.                   | 4.1      |
|                           | 2-8 h   | 12.1                                  | 7.0                    | 3.4                                | 2.6                    | 4.2      |
|                           | 16-24 h | 11.1                                  | 5.3                    | 4.2                                | 2.6                    | 4.8      |
|                           | 24-36 h | 4.6                                   | 5.0                    | 3.4                                | 2.8                    | 5.3      |
|                           | >48 h   | 3.1                                   | 3.3                    | 3.5                                | 4.3                    | 2.9      |
| <i>Irpex</i> sp.          | 0 h     | N.D.                                  | 2.2                    | N.D.                               | 4.3                    | 4.1      |
|                           | 2-8 h   | N.D.                                  | 4.0                    | N.D.                               | 2.2                    | 3.9      |
|                           | 16-24 h | N.D.                                  | 3.7                    | N.D.                               | 2.4                    | 4.8      |
|                           | 24-36 h | 13.5                                  | 3.7                    | 16.5                               | 2.7                    | 5.6      |
|                           | >48 h   | N.D.                                  | 3.7                    | 10.9                               | 4.3                    | 5.9      |
| <i>Penicillium</i> sp.    | 0 h     | 9.2                                   | N.D.                   | N.D.                               | N.D.                   | 5.4      |
|                           | 2-8 h   | N.D.                                  | N.D.                   | N.D.                               | 4.2                    | 9.9      |
|                           | 16-24 h | N.D.                                  | N.D.                   | 11.4                               | 3.7                    | 6.7      |

|                                                                  |                                               |         |         |         |         |          |
|------------------------------------------------------------------|-----------------------------------------------|---------|---------|---------|---------|----------|
|                                                                  | 24-36 h                                       | N.D.    | N.D.    | 4.7     | 4.4     | 5.6      |
|                                                                  | >48 h                                         | 3.6     | 4.3     | 3.9     | N.D.    | 6.7      |
| <i>P. lilacinum</i>                                              | 0 h                                           | 3.2     | 2.4     | 6.2     | 4.0     | 6.1      |
|                                                                  | 2-8 h                                         | 5.2     | 4.1     | 3.2     | 2.5     | 5.9      |
|                                                                  | 16-24 h                                       | 5.8     | 3.9     | 3.5     | 2.5     | 5.1      |
|                                                                  | 24-36 h                                       | 4.0     | 3.2     | 2.8     | 2.5     | 5.6      |
|                                                                  | >48 h                                         | 3.0     | 3.2     | 3.4     | 3.7     | 3.3      |
| <i>Syncephalastrum</i><br>sp.                                    | 0 h                                           | 3.9     | 2.6     | 1.8     | 2.1     | 4.2      |
|                                                                  | 2-8 h                                         | 3.3     | 2.7     | 1.9     | 2.2     | 3.5      |
|                                                                  | 16-24 h                                       | 3.3     | 2.7     | 2.1     | 2.2     | 3.8      |
|                                                                  | 24-36 h                                       | 3.1     | 2.6     | 2.2     | 2.3     | 3.3      |
|                                                                  | >48 h                                         | 2.6     | 2.8     | 2.4     | 2.6     | 2.1      |
| Sensitivity ( <i>n</i> =50<br>total cultures, 5<br>per organism) | Detected<br>within 5 days<br>( <i>n</i> , %)  | 34 (68) | 45 (90) | 34 (68) | 47 (94) | 44 (88)  |
|                                                                  | Detected<br>within 15 days<br>( <i>n</i> , %) | 41 (82) | 46 (92) | 45 (90) | 47 (94) | 50 (100) |
